# Supplementary material for: Quantifying degrees of necessity and of sufficiency in cause‐effect relationships with dichotomous and survival outcomes
Source: PubMed Central journal article supplement (PMC6771968; doi:10.1002/sim.8331), 2019-08-06
Supplement: SIM-38-4733-s001.pdf [file SIM-38-4733-s001.pdf]

# Quantifying degrees of necessity and of sufficiency in cause-effect relationships with dichotomous and survival outcomes - Supplementary material

Andreas Gleiss, Michael Schemper

Section for Clinical Biometrics, Center for Medical Statistics, Informatics, and Intelligent Systems, Medical University of Vienna, Austria

**SUPPLEMENTARY TABLE 1:** Small sample bias for estimating *DN* and *DS* for dichotomous outcome and dichotomous prognostic factor, summarized by median (quartiles), for selected scenarios in Table 3.

| Scen. | P(D) | $\alpha$ | OR | Population |       | Bias (n=200)          |                        | Bias (n=500)          |                       |
|-------|------|----------|----|------------|-------|-----------------------|------------------------|-----------------------|-----------------------|
|       |      |          |    | DN         | DS    | DN                    | DS                     | DN                    | DS                    |
| 1     | 0.1  | 0.1      | 10 | 0.346      | 0.346 | 0.00<br>(-0.07; 0.07) | -0.01<br>(-0.08; 0.09) | 0.00<br>(-0.04; 0.04) | 0.00<br>(-0.05; 0.05) |
| 2     | 0.1  | 0.5      | 10 | 0.787      | 0.087 | 0.01<br>(-0.10; 0.10) | 0.00<br>(-0.02; 0.01)  | 0.00<br>(-0.06; 0.06) | 0.00<br>(-0.01; 0.01) |
| 3     | 0.1  | 0.9      | 10 | 0.878      | 0.011 | 0.12<br>(0.12; 0.12)  | 0.00<br>(0.00; 0.00)   | 0.12<br>(-0.08; 0.12) | 0.00<br>(0.00; 0.00)  |
| 4     | 0.5  | 0.1      | 10 | 0.087      | 0.787 | 0.00<br>(-0.01; 0.01) | 0.01<br>(-0.08; 0.11)  | 0.00<br>(-0.01; 0.01) | 0.01<br>(-0.06; 0.06) |
| 5     | 0.5  | 0.5      | 10 | 0.519      | 0.519 | 0.00<br>(-0.04; 0.05) | 0.00<br>(-0.04; 0.05)  | 0.00<br>(-0.03; 0.03) | 0.00<br>(-0.03; 0.03) |
| 6     | 0.5  | 0.9      | 10 | 0.787      | 0.087 | 0.01<br>(-0.08; 0.11) | 0.00<br>(-0.01; 0.01)  | 0.01<br>(-0.05; 0.05) | 0.00<br>(-0.01; 0.01) |
| 7     | 0.9  | 0.1      | 10 | 0.011      | 0.878 | 0.00<br>(0.00; 0.00)  | 0.12<br>(0.12; 0.12)   | 0.00<br>(0.00; 0.00)  | 0.12<br>(-0.08; 0.12) |
| 8     | 0.9  | 0.5      | 10 | 0.087      | 0.787 | 0.00<br>(-0.02; 0.01) | 0.00<br>(-0.09; 0.10)  | 0.00<br>(-0.01; 0.01) | 0.00<br>(-0.06; 0.06) |
| 9     | 0.9  | 0.9      | 10 | 0.346      | 0.346 | 0.01<br>(-0.06; 0.09) | 0.01<br>(-0.07; 0.10)  | 0.00<br>(-0.05; 0.05) | 0.01<br>(-0.03; 0.05) |
| 28    | 0.1  | 0.1      | 1  | 0.000      | 0.000 | 0.14<br>(0.05; 0.47)  | 0.01<br>(0.01; 0.05)   | 0.09<br>(0.03; 0.29)  | 0.01<br>(0.00; 0.02)  |
| 29    | 0.5  | 0.5      | 1  | 0.000      | 0.000 | 0.05<br>(0.02; 0.08)  | 0.05<br>(0.02; 0.08)   | 0.03<br>(0.01; 0.05)  | 0.03<br>(0.01; 0.05)  |

Abbreviations: P(D), unconditional disease probability; OR, odds ratio;  $\alpha$ , probability of harmful level of X. Results based on 500 simulated samples and presented as medians (quartiles).

**SUPPLEMENTARY TABLE 2:** Small sample bias for estimating  $DN$  and  $DS$  for dichotomous outcome and continuous prognostic factor, summarized by medians (quartiles), for the scenarios in Fig. 1, and additionally for  $OR=1$ .

| <b>P(D)</b> | <b>OR</b> | <b>Population</b>     |                       | <b>Bias (n=200)</b>   |                       | <b>Bias (n=500)</b>   |                       |
|-------------|-----------|-----------------------|-----------------------|-----------------------|-----------------------|-----------------------|-----------------------|
|             |           | <b>DN<sub>1</sub></b> | <b>DS<sub>1</sub></b> | <b>DN<sub>1</sub></b> | <b>DS<sub>1</sub></b> | <b>DN<sub>1</sub></b> | <b>DS<sub>1</sub></b> |
| 0.5         | 1         | 0.00                  | 0.00                  | 0.05<br>(0.02; 0.08)  | 0.05<br>(0.02; 0.08)  | 0.03<br>(0.01; 0.05)  | 0.03<br>(0.01; 0.05)  |
| 0.5         | 10        | 0.67                  | 0.67                  | 0.00<br>(-0.03; 0.03) | 0.01<br>(-0.02; 0.04) | 0.00<br>(-0.02; 0.02) | 0.00<br>(-0.02; 0.02) |
| 0.5         | 100       | 0.82                  | 0.82                  | 0.00<br>(-0.02; 0.03) | 0.01<br>(-0.02; 0.03) | 0.00<br>(-0.01; 0.02) | 0.00<br>(-0.01; 0.01) |
| 0.9         | 1         | 0.00                  | 0.00                  | 0.02<br>(0.01; 0.03)  | 0.15<br>(0.07; 0.23)  | 0.01<br>(0.00; 0.02)  | 0.08<br>(0.04; 0.14)  |
| 0.9         | 10        | 0.36                  | 0.82                  | 0.01<br>(-0.06; 0.06) | 0.01<br>(-0.03; 0.04) | 0.00<br>(-0.04; 0.03) | 0.00<br>(-0.02; 0.02) |
| 0.9         | 100       | 0.56                  | 0.93                  | 0.00<br>(-0.06; 0.06) | 0.00<br>(-0.02; 0.02) | 0.00<br>(-0.04; 0.04) | 0.00<br>(-0.01; 0.01) |

Abbreviations:  $P(D)$ , unconditional disease probability;  $OR$ , odds ratio. Results based on 250 simulated samples and presented as median (quartiles).

**SUPPLEMENTARY TABLE 3:** Small sample bias for estimating *DN* and *DS* for censored survival outcome and balanced dichotomous prognostic factor

| HR  | $\tau$ | % cens. | Type 1 censoring |           |                 |                |                 |                | Administrative censoring |                |                |                 |                |
|-----|--------|---------|------------------|-----------|-----------------|----------------|-----------------|----------------|--------------------------|----------------|----------------|-----------------|----------------|
|     |        |         | Population       |           | Bias (n=200)    |                | Bias (n=500)    |                | % cens.                  | Bias (n=200)   |                | Bias (n=500)    |                |
|     |        |         | <i>DN</i>        | <i>DS</i> | <i>DN</i>       | <i>DS</i>      | <i>DN</i>       | <i>DS</i>      |                          |                | <i>DN</i>      | <i>DS</i>       | <i>DN</i>      |
| 1   | -      | 0       | 0.00             | 0.00      | 0.03<br>(0.04)  | 0.04<br>(0.06) | 0.02<br>(0.03)  | 0.03<br>(0.04) |                          |                |                |                 |                |
|     | 1.64   | 20      | 0.00             | 0.00      | 0.04<br>(0.04)  | 0.03<br>(0.04) | 0.03<br>(0.03)  | 0.02<br>(0.03) | 50                       | 0.05<br>(0.06) | 0.04<br>(0.04) | 0.03<br>(0.08)  | 0.03<br>(0.06) |
|     | 0.22   | 80      | 0.00             | 0.00      | 0.10<br>(0.14)  | 0.01<br>(0.02) | 0.07<br>(0.07)  | 0.01<br>(0.01) | 90                       | 0.15<br>(0.32) | 0.02<br>(0.04) | 0.09<br>(0.19)  | 0.01<br>(0.02) |
| 2   | -      | 0       | 0.22             | 0.31      | 0.00<br>(0.05)  | 0.00<br>(0.06) | 0.00<br>(0.04)  | 0.00<br>(0.05) |                          |                |                |                 |                |
|     | 2.26   | 23      | 0.25             | 0.20      | 0.01<br>(0.08)  | 0.01<br>(0.06) | 0.00<br>(0.05)  | 0.00<br>(0.04) | 50                       | 0.00<br>(0.08) | 0.00<br>(0.07) | 0.00<br>(0.06)  | 0.00<br>(0.06) |
|     | 0.30   | 80      | 0.32             | 0.04      | 0.02<br>(0.22)  | 0.00<br>(0.02) | -0.01<br>(0.12) | 0.00<br>(0.02) | 90                       | 0.00<br>(0.28) | 0.00<br>(0.03) | -0.01<br>(0.15) | 0.00<br>(0.02) |
| 10  | -      | 0       | 0.55             | 0.62      | 0.00<br>(0.04)  | 0.00<br>(0.04) | 0.00<br>(0.03)  | 0.00<br>(0.03) |                          |                |                |                 |                |
|     | 4.90   | 31      | 0.71             | 0.44      | 0.00<br>(0.06)  | 0.00<br>(0.04) | 0.00<br>(0.04)  | 0.00<br>(0.02) | 50                       | 0.00<br>(0.09) | 0.00<br>(0.06) | 0.00<br>(0.05)  | 0.00<br>(0.04) |
|     | 0.43   | 81      | 0.80             | 0.09      | 0.00<br>(0.11)  | 0.00<br>(0.02) | 0.00<br>(0.07)  | 0.00<br>(0.02) | 90                       | 0.01<br>(0.16) | 0.00<br>(0.05) | 0.01<br>(0.10)  | 0.00<br>(0.02) |
| 100 | -      | 0       | 0.67             | 0.69      | -0.01<br>(0.04) | 0.00<br>(0.04) | 0.00<br>(0.02)  | 0.00<br>(0.02) |                          |                |                |                 |                |
|     | 15.30  | 43      | 0.96             | 0.45      | 0.00<br>(0.03)  | 0.00<br>(0.03) | 0.00<br>(0.02)  | 0.00<br>(0.02) | 50                       | 0.00<br>(0.03) | 0.01<br>(0.04) | 0.00<br>(0.02)  | 0.00<br>(0.03) |
|     | 0.47   | 81      | 0.98             | 0.11      | 0.02<br>(0.04)  | 0.00<br>(0.02) | 0.00<br>(0.03)  | 0.00<br>(0.02) | 90                       | 0.02<br>(0.04) | 0.00<br>(0.05) | 0.02<br>(0.04)  | 0.00<br>(0.03) |

Abbreviations: HR, hazard ratio;  $\tau$ , time of maximum follow-up; % cens., percentage of censored observations. Results based on 250 simulated samples and presented as medians (inter-quartile ranges).

**SUPPLEMENTARY TABLE 4:** Small sample bias for estimating *DN* and *DS* for uncensored survival outcome and dichotomous prognostic factor for the scenarios of Table 5.

|                | HR  | Population |           | Bias (n=200)           |                        | Bias (n=500)           |                        |
|----------------|-----|------------|-----------|------------------------|------------------------|------------------------|------------------------|
|                |     | <i>DN</i>  | <i>DS</i> | <i>DN</i>              | <i>DS</i>              | <i>DN</i>              | <i>DS</i>              |
| $\alpha = 0.1$ | 1   | 0.00       | 0.00      | 0.02<br>(0.01; 0.08)   | 0.04<br>(0.02; 0.18)   | 0.01<br>(0.01; 0.05)   | 0.02<br>(0.01; 0.09)   |
|                | 2   | 0.05       | 0.47      | 0.00<br>(-0.01; 0.01)  | 0.01<br>(-0.07; 0.06)  | 0.00<br>(-0.01; 0.01)  | -0.01<br>(-0.05; 0.03) |
|                | 10  | 0.16       | 0.85      | 0.00<br>(-0.02; 0.02)  | 0.00<br>(-0.03; 0.02)  | 0.00<br>(-0.01; 0.01)  | 0.00<br>(-0.01; 0.01)  |
|                | 100 | 0.24       | 0.94      | 0.01<br>(-0.02; 0.04)  | -0.01<br>(-0.02; 0.00) | 0.00<br>(-0.02; 0.03)  | 0.00<br>(-0.01; 0.00)  |
| $\alpha = 0.5$ | 1   | 0.00       | 0.00      | 0.03<br>(0.01; 0.05)   | 0.04<br>(0.02; 0.08)   | 0.02<br>(0.01; 0.04)   | 0.03<br>(0.01; 0.05)   |
|                | 2   | 0.22       | 0.31      | 0.00<br>(-0.02; 0.03)  | 0.00<br>(-0.03; 0.03)  | 0.00<br>(-0.02; 0.02)  | 0.00<br>(-0.03; 0.02)  |
|                | 10  | 0.55       | 0.61      | 0.00<br>(-0.02; 0.02)  | 0.00<br>(-0.02; 0.02)  | 0.00<br>(-0.02; 0.01)  | 0.00<br>(-0.02; 0.01)  |
|                | 100 | 0.68       | 0.68      | -0.01<br>(-0.03; 0.01) | 0.00<br>(-0.02; 0.02)  | 0.00<br>(-0.01; 0.01)  | 0.00<br>(-0.01; 0.01)  |
| $\alpha = 0.9$ | 1   | 0.00       | 0.00      | 0.02<br>(0.01; 0.08)   | 0.04<br>(0.01; 0.13)   | 0.02<br>(0.01; 0.06)   | 0.02<br>(0.01; 0.08)   |
|                | 2   | 0.36       | 0.08      | -0.01<br>(-0.09; 0.07) | 0.00<br>(-0.03; 0.02)  | -0.01<br>(-0.06; 0.05) | 0.00<br>(-0.02; 0.01)  |
|                | 10  | 0.80       | 0.21      | 0.00<br>(-0.04; 0.03)  | -0.01<br>(-0.03; 0.02) | 0.00<br>(-0.03; 0.02)  | 0.00<br>(-0.02; 0.01)  |
|                | 100 | 0.93       | 0.25      | -0.01<br>(-0.03; 0.00) | 0.00<br>(-0.03; 0.02)  | 0.00<br>(-0.01; 0.01)  | 0.00<br>(-0.02; 0.01)  |

Abbreviations: HR, hazard ratio;  $\alpha$ , probability of harmful level of X. Results based on 250 simulated samples and presented as medians (quartiles).

## Programming Code

In the following we provide a SAS macro and an R function to calculate DN and DS for dichotomous outcomes. See <http://cemsii.meduniwien.ac.at/en/kb/science-research/software/statistical-software> for latest versions as well as for additional functions for survival.

### SAS Macro

```
*****;
*
* NECSUFF
* =====
*
* SAS-macro for computation of degrees of necessity and sufficiency
*
* Gleiss, A. & Schemper, M., Quantifying degrees of necessity and
* sufficiency in cause-effect relationships with dichotomous and
* survival outcome
* submitted to Stat.Med.
*
* Author:  Andreas Gleiss
* Version: 1.0
* Date:    8 August 2018
*
* Macro parameters:
* =====
*
* data      name of SAS data set
* y         name of dichotomous outcome variable
* x         name of independent variable (or linear predictor)
* refcat   reference category of y (first=default or last)
* inpred   dataset containing predictions
* inpredvar name of variable in inpred dataset containing
*          predictions
* odssel   control output from proc logistic
*          (default: ResponseProfile)
* print    =1 to print results (default), =0 (e.g., for simulations)
*
*****;

%macro necsuff(data, y, x, refcat=first, inpred=, inpredvar=,
              odssel=ResponseProfile, print=1);
data _work;
  set &data;
  if missing(&x) or missing(&y) then delete;
run;
%if &inpred= %then %do;
  ods select &odssel;
  proc logistic data=_work outest=_betas;
    class &y / param=ref ref=&refcat;
    model &y=&x;
    output out=_est1 pred=p_i_dach;
  run;
  data _betas;
    set _betas(rename=(intercept=beta0 &x=beta1));
    _dummy=1;
    keep _dummy beta0 beta1;
%end;
endmacro necsuff;
```

```

run;
%end;
%else %do;
data _est1;
set &inpred;
p_i_dach=&inpredvar;
run;
data _betas;
_dummy=1; beta0=.; betal=.; output;
run;
%end;
proc sort data=_est1;
by descending p_i_dach;
run;
data _est1;
set _est1;
_dummy=1;
_row=_n_;
run;
proc means data=_work noprint;
var &y;
output out=_my1 mean=p_bar max=_dummy;
run;
data _est1_;
merge _est1
_my1(keep=p_bar _dummy _freq_ rename=( _freq_=n))
_betas;
by _dummy;
retain dn1_sum ds1_sum dn2_sum ds2_sum n_smaller n_larger (0 0 0 0 0 0);

smaller=(p_i_dach<p_bar);
larger=(p_i_dach>p_bar);
n_smaller=n_smaller+smaller;
n_larger=n_larger+larger;

if p_bar~=0 then do;
if smaller then dn1_sum=dn1_sum + ((p_bar - p_i_dach)/p_bar)**2;
if smaller then dn2_sum=dn2_sum + ((p_bar - p_i_dach)/p_bar);
end;
if p_bar~=1 then do;
if larger then ds1_sum=ds1_sum + ((p_i_dach - p_bar)/(1-
p_bar))**2;
if larger then ds2_sum=ds2_sum + ((p_i_dach - p_bar)/(1-p_bar));
end;
run;

data _necsuff_;
set _est1_;
where _row=n;
if n_smaller~=0 then do;
dn_1=dn1_sum/n_smaller;
dn_2=dn2_sum/n_smaller;
end;
if n_larger~=0 then do;
ds_1=ds1_sum/n_larger;
ds_2=ds2_sum/n_larger;
end;
weight_dn=p_bar/(1-p_bar) * n_smaller/n;

```

```

weight_ds=(1-p_bar)/p_bar * n_larger/n;
ev_indir=weight_dn*dn_1_ + weight_ds*ds_1_;
dn_1=sqrt(dn_1_);
ds_1=sqrt(ds_1_);
alpha=n_larger/n;
or=exp(beta1);
progn_fact="&x";
keep progn_fact p_bar alpha or ev_indir dn_1 ds_1 dn_2 ds_2;
run;
ods select all;
%if &print=1 %then %do;
  title "Degrees of necessity and sufficiency";
  title2 "Outcome = &y";
  proc print data=_necsuff_ noobs label;
    var progn_fact p_bar alpha or ev_indir dn_1 ds_1 dn_2 ds_2;
    format or p_bar alpha ev_indir dn: ds: f5.3;
    label
      progn_fact="Prognostic factor"
      or="OR" ev_indir="EV" p_bar="est.P(D)"
      dn_1="DN1" ds_1="DS1" dn_2="DN2" ds_2="DS2";
  run;
  title; title2;
%end;
%mend;

*%necsuff(data=sh_tab3.hl_prost, y=capsule, x=psa);
*%necsuff(data=sh_tab3.hl_prost, y=capsule, x=gleason, odssel=none);

data lungca; * Swedish cohort study (Nilsson et al, 2001);
  do i=1 to 8120;
    x=0; y=0; output;
  end;
  do i=1 to 36;
    x=0; y=1; output;
  end;
  do i=1 to 4331;
    x=1; y=0; output;
  end;
  do i=1 to 177;
    x=1; y=1; output;
  end;
run;
%necsuff(data=lungca, y=y, x=x);

```

## R function

```
#####  
#  
# NecSuff  
# =====  
#  
# R-function for computing degrees of necessity and sufficiency  
#  
# Gleiss, A. & Schemper, M. Quantifying degrees of necessity and  
# sufficiency in cause-effect relationships with dichotomous and  
# survival outcome,  
# submitted to Stat.Med.  
#  
# Author:  Andreas Gleiss  
# Version: 1.0  
# Date:    09 Aug 2018  
#  
# Arguments:  
# =====  
#  
# pred      name of variable containing predictions  
#  
#####  
  
NecSuff<-function(pred){  
  p_bar<-mean(pred)  
  smaller<-(pred<p_bar)  
  larger<-(pred>p_bar)  
  DN1<-sqrt(mean(((p_bar-pred[smaller])/p_bar)^2))  
  DS1<-sqrt(mean(((pred[larger]-p_bar)/(1-p_bar))^2))  
  DN2<-mean((p_bar-pred[smaller])/p_bar)  
  DS2<-mean((pred[larger]-p_bar)/(1-p_bar))  
  
  w_dn<-p_bar/(1-p_bar) * sum(smaller)/length(pred)  
  w_ds<-(1-p_bar)/p_bar * sum(larger)/length(pred)  
  EV<-w_dn*DN1^2 + w_ds*DS1^2  
  
  cat('\nest.P(D) =',round(p_bar,3))  
  cat('\nDN1 =',round(DN1,3),', DS1 =',round(DS1,3))  
  cat('\nDN2 =',round(DN2,3),', DS1 =',round(DS2,3))  
  cat('\nEV =',round(EV,3))  
}  
  
xx<-rnorm(1000)  
pp<-1/(1+exp(-5-log(5)*xx))  
yy<-1*(runif(1000)<=pp)  
plot(yy~xx)  
points(cbind(xx,pp),col="red")  
res.glm<-glm(yy~xx, family=binomial)
```



```
summary(res.glm)
pred<-predict(res.glm, type="response")
NecSuff(pred)

# Swedish cohort (Nilsson et al, 2001)
xx<-c(rep(0,36),rep(1,177),rep(0,8120),rep(1,4331))
yy<-c(rep(1,36),rep(1,177),rep(0,8120),rep(0,4331))
table(yy,xx)
res.glm<-glm(yy~xx, family=binomial)
summary(res.glm)
pred<-predict(res.glm, type="response")
NecSuff(pred)
```
